# Supplementary material for: AFF3, a susceptibility factor for autoimmune diseases, is a molecular facilitator of immunoglobulin class switch recombination
Source: PubMed Central journal article supplement — Sci Adv. 2022 Aug 24;8(34):eabq0008. doi: 10.1126/sciadv.abq0008 (PMC9401627; doi:10.1126/sciadv.abq0008), 2022-08-24
Supplement: sciadv.abq0008_sm.pdf [file sciadv.abq0008_sm.pdf]

Supplementary Materials for

**AFF3, a susceptibility factor for autoimmune diseases, is a molecular  
facilitator of immunoglobulin class switch recombination**

Shin-ichi Tsukumo *et al.*

Corresponding author: Koji Yasutomo, yasutomo@tokushima-u.ac.jp

*Sci. Adv.* **8**, eabq0008 (2022)  
DOI: 10.1126/sciadv.abq0008

**This PDF file includes:**

Figs. S1 to S9  
Tables S1 to S5  
References

1347 genes

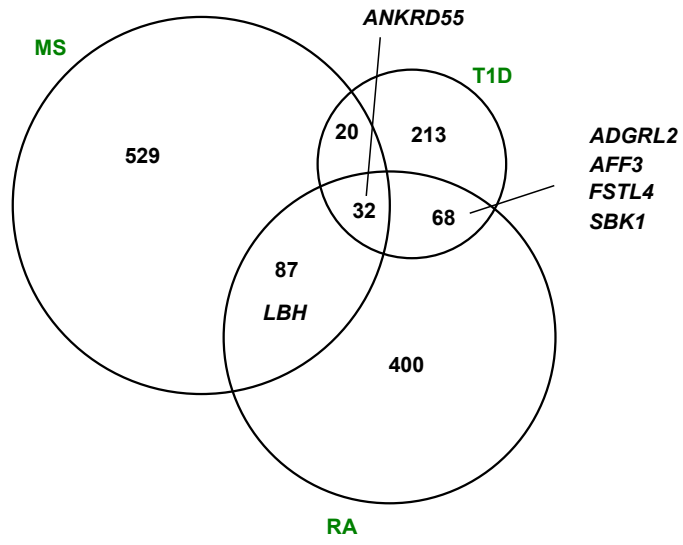

**Fig. S1.** Venn diagram of genes potentially related to rheumatoid arthritis (RA), multiple sclerosis (MS), and type 1 diabetes (T1D). The diagram was produced based on data registered in the GWAS Catalog. The numbers in the figure indicate the numbers of genes in the different regions. The names of genes that are registered in association with at least two diseases and are highly expressed in lymphocytes but have unknown functions in the immune system are shown in the figure.

a

EI EcoRI  
BH BamHI  
EV EcoRV

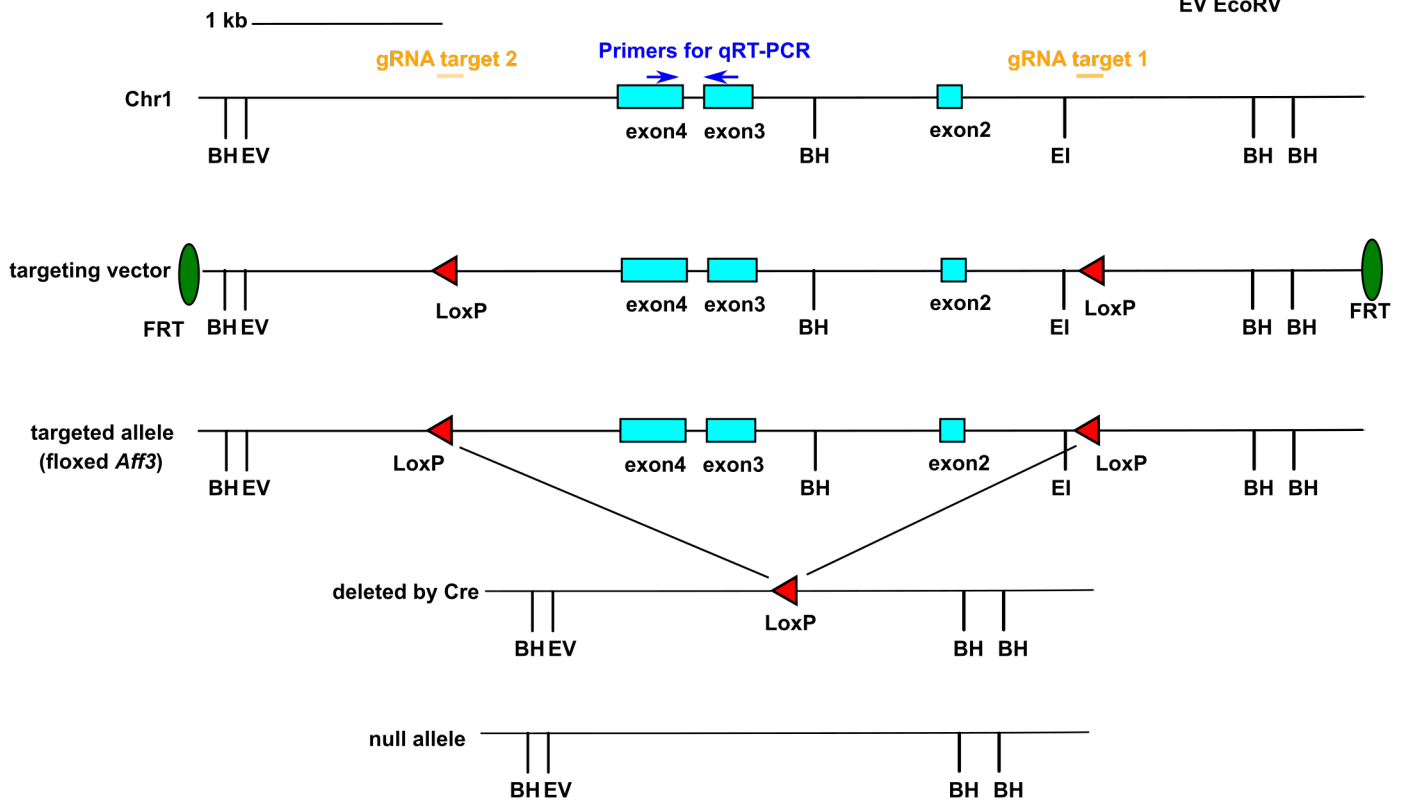

b

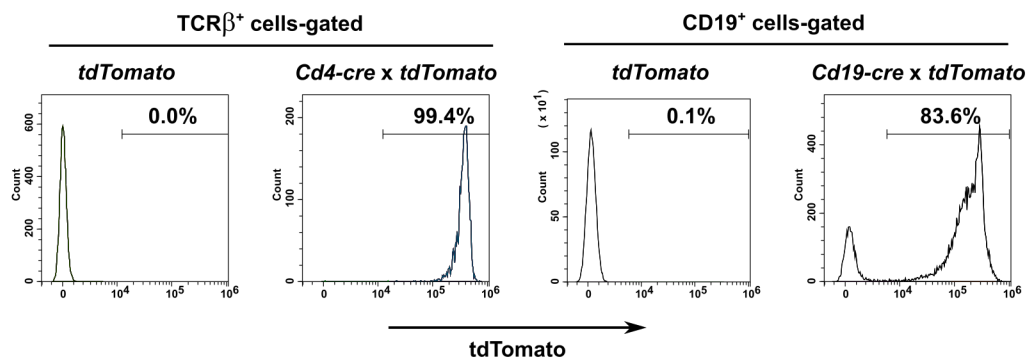

c

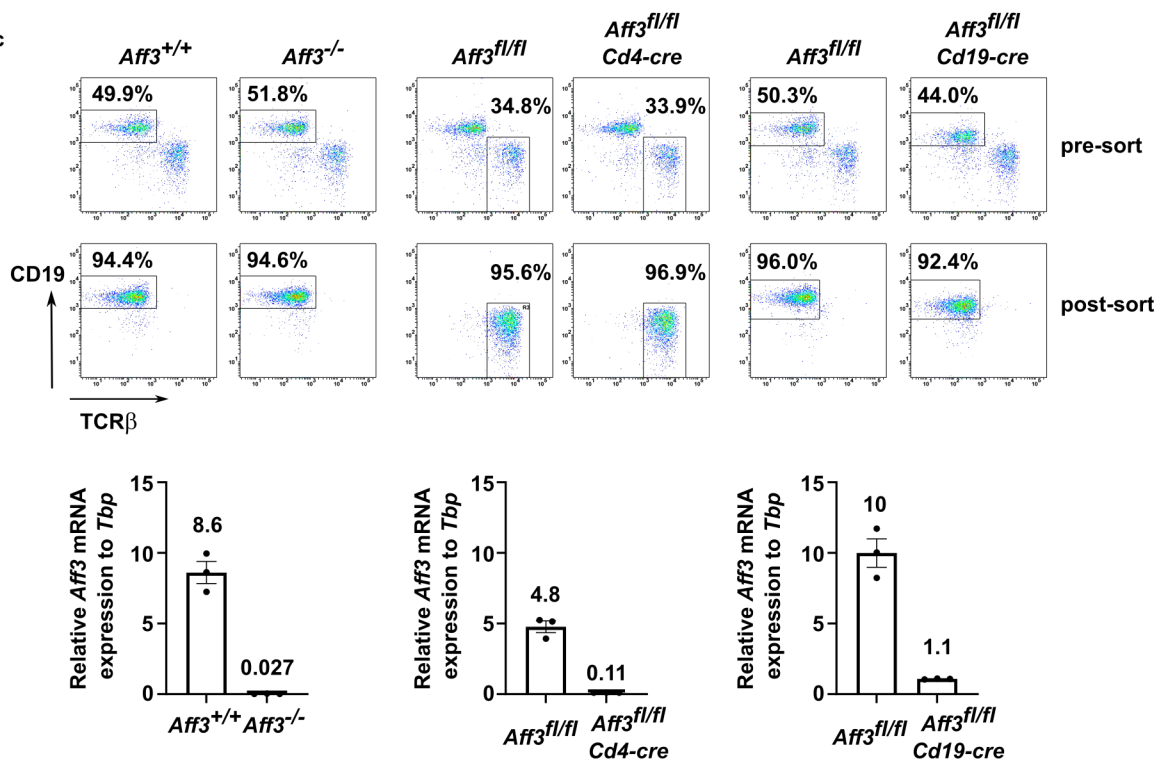

**Fig. S2.** (a) Schematic diagram of the mouse *Aff3* gene locus and the CRISPR–Cas9 strategy used to create the *Aff3*-null and floxed-*Aff3* alleles. The knock-in of the LoxP fragment and the deletion of exons were confirmed by PCR cloning and sequencing of this region. The deletion from exons 2 to 4 induces a frameshift and results in the production of a small protein consisting of 17 amino acids of the AFF3 N-terminus and 14 amino acids resulting from the frameshift. The positions of the gRNAs and the primers used for qRT–PCR in (c) are shown at the top. (b) The efficiency of Cre-mediated deletion was assessed by using Rosa26-*loxP*-flanked stop cassette-tdTomato (*R26<sup>LSL-tdTomato</sup>*) mice as reporters. Spleen TCR $\beta^+$  T cells (for *Cd4-cre*) or spleen CD19 $^+$  cells (for *Cd19-cre*) were gated and examined for the expression of tdTomato. (c) Efficiency of *Aff3* gene deletion. B or T cells were purified from the spleens of mice of each genotype by magnet sorting. The purity of the cells was verified by flow cytometry (upper panels). Total RNA was extracted from the purified cells and used for qRT–PCR. *Aff3* mRNA expression was normalized to *Tbp* mRNA expression (lower panels). *Aff3<sup>fl/fl</sup>*, *Aff3<sup>fl/fl</sup> Cd4-cre<sup>+</sup>*, and *Aff3<sup>fl/fl</sup> Cd19-cre<sup>+</sup>* indicate floxed *Aff3*, floxed *Aff3* crossed with *Cd4-cre*, and floxed *Aff3* crossed with *Cd19-cre* mice, respectively. The primers used in the experiments are indicated in (a) and listed in Table S4.

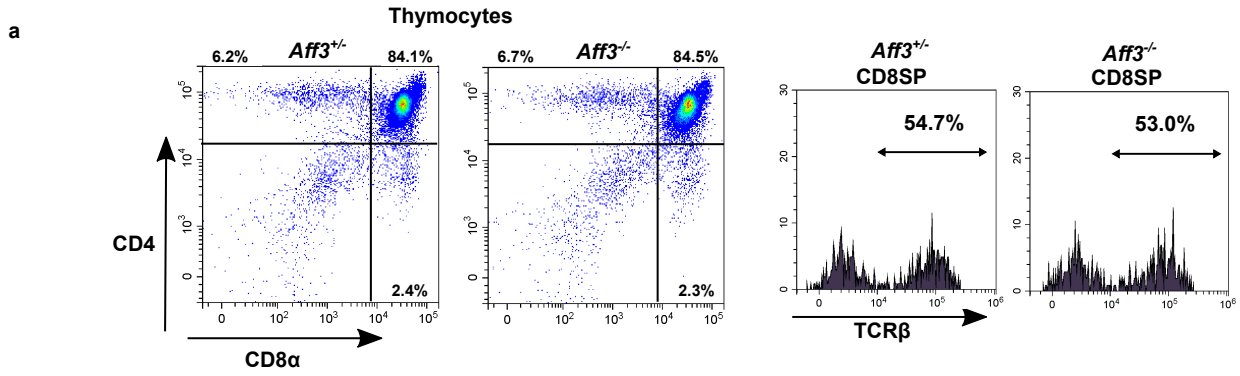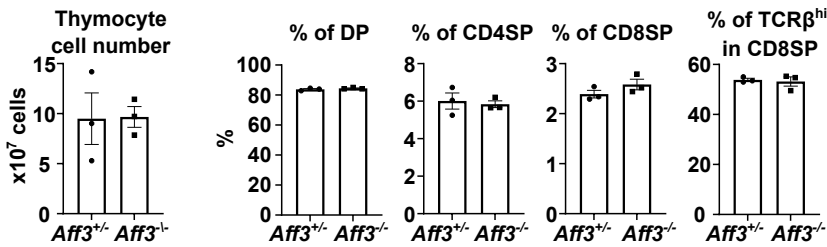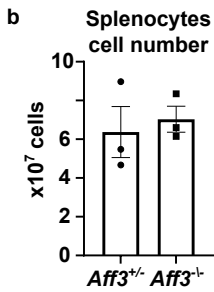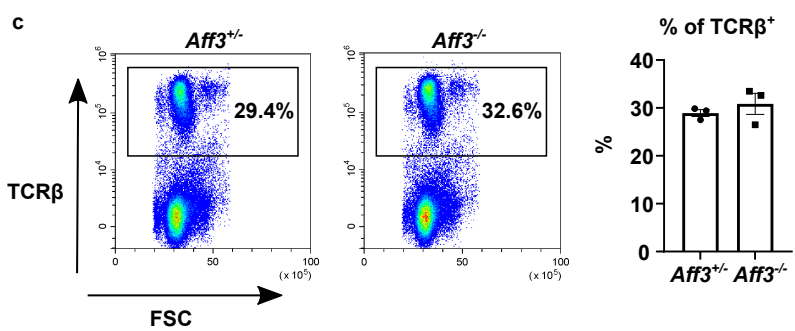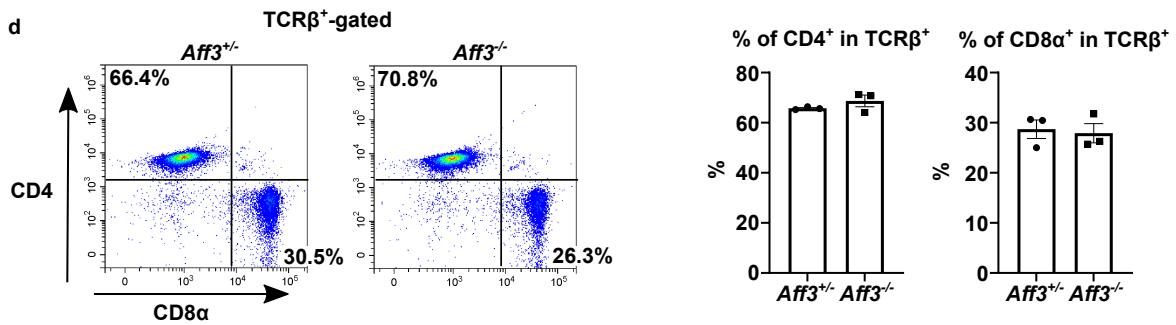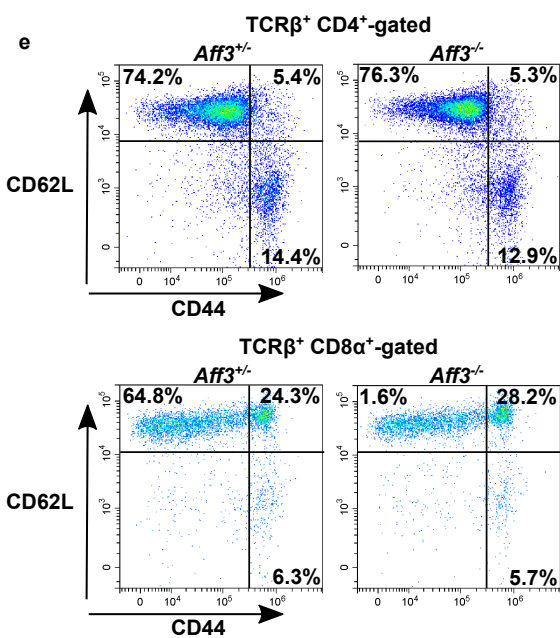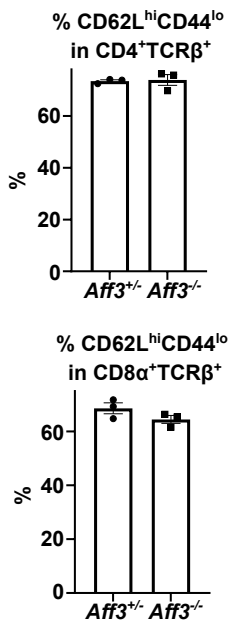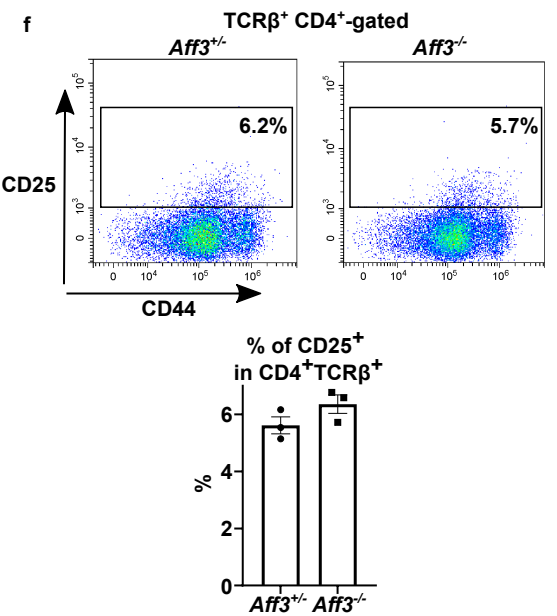

**Fig. S3.** Effects of *Aff3* deficiency on T-cell populations. (a) Analysis of thymocytes and T-cell subpopulations (n=3 in each group). (b-f) Analysis of splenocytes. (b) Number of splenocytes (n=3 in each group). (c) Flow cytometry analysis of T cells in the splenocyte population (n=3 in each group). (d) CD4 and CD8 $\alpha$  profiles of TCR $\beta^+$ -gated cells (n=3 in each group). (e) CD62L and CD44 profiles of TCR $\beta^+$ - and CD4 $^+$ - or CD8 $^+$ -gated T cells (n=3 in each group). (f) CD25 expression in TCR $\beta^+$ CD4 $^+$  T cells (n=3 in each group). The data are shown as the mean  $\pm$  SEM. The P values were calculated using an unpaired t test with Welch's correction, but no significant differences ( $p \leq 0.05$ ) were observed. The data shown in this figure are representative of two experiments.

a

CD4<sup>+</sup>-gated cells

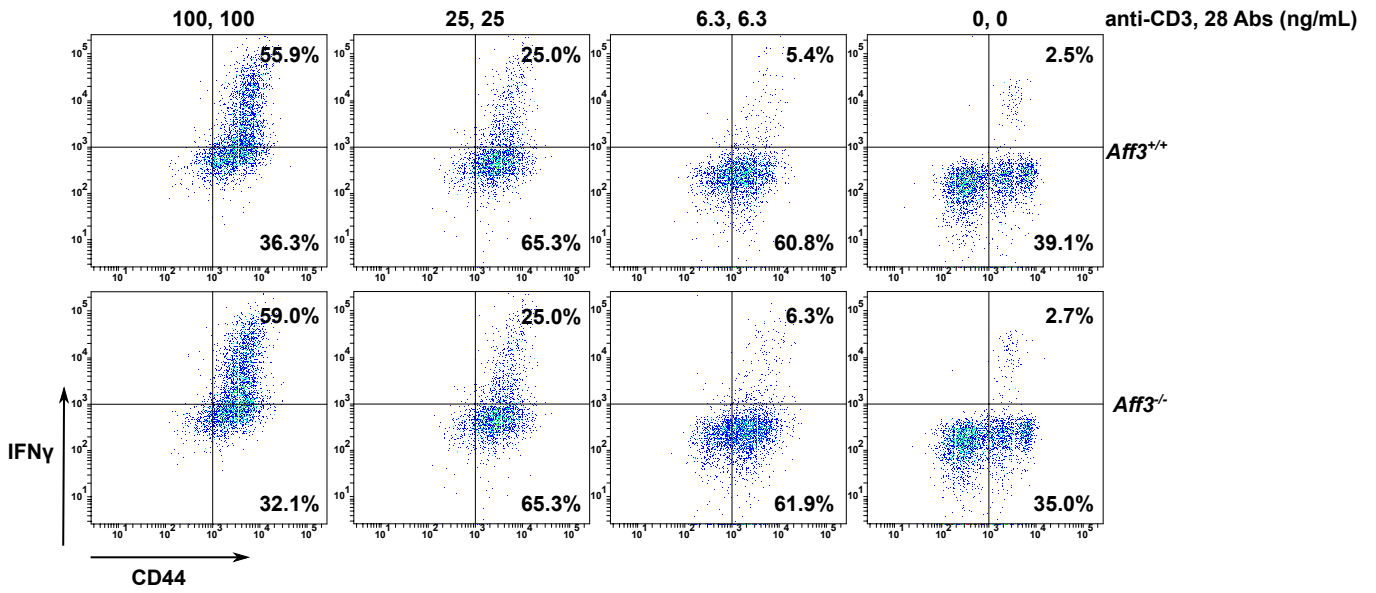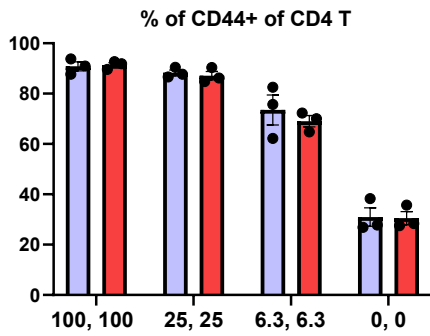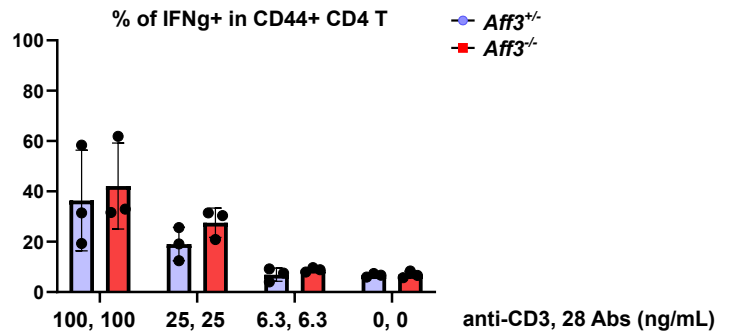

b

CD8<sup>+</sup>-gated cells

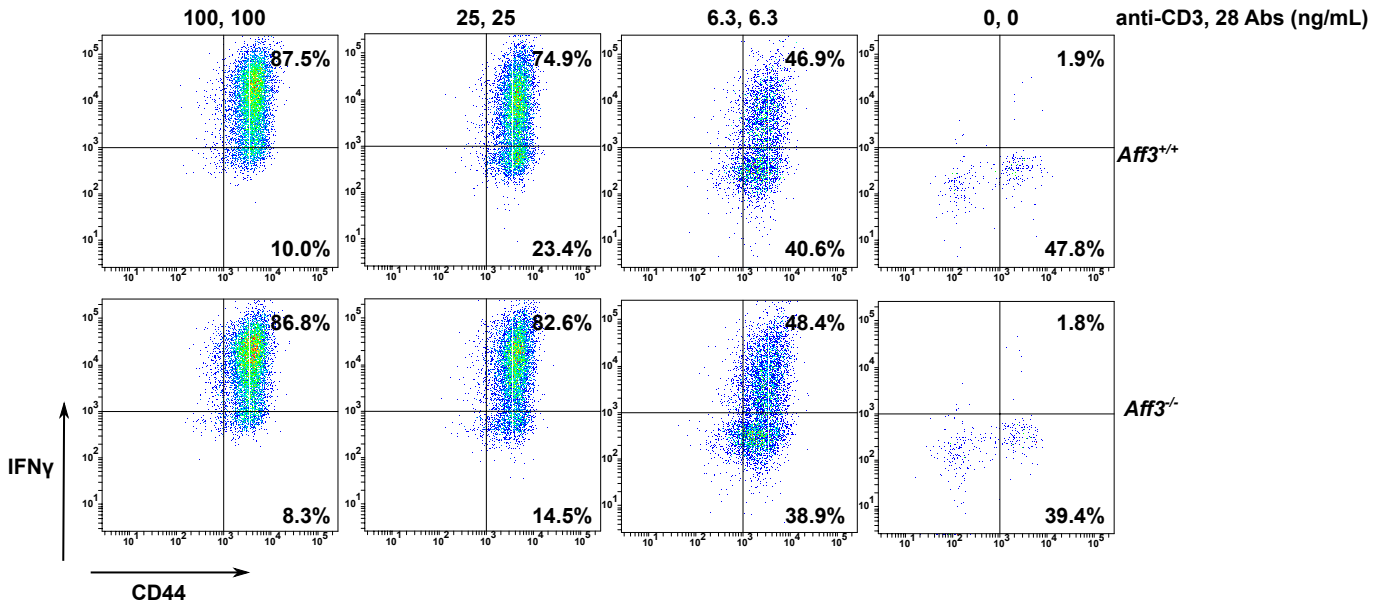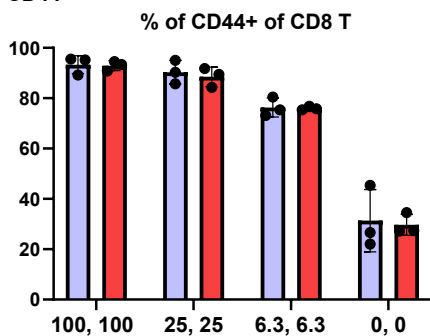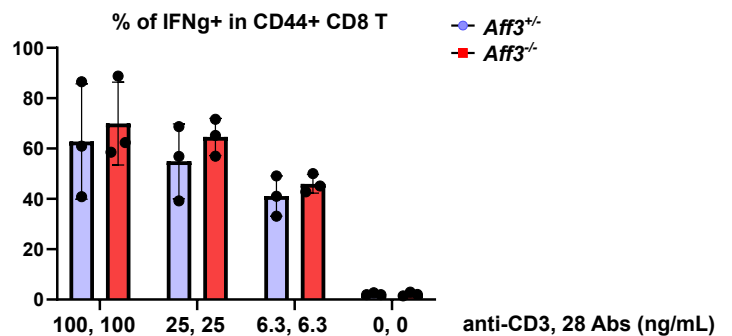



**Fig. S4.** Effects of *Aff3* deficiency on (a) Th1 and (b) CTL cells. Splenocytes were cultured with anti-CD3 and soluble anti-CD28 antibodies at the indicated concentrations. After 3 days of culture, the cells were restimulated with PMA, ionomycin, and brefeldin A for 5 hours. Intracellular IFN $\gamma$  expression was assessed by flow cytometry. The data shown in this figure are representative of three experiments. In all panels, the data are shown as the mean  $\pm$  SEM.

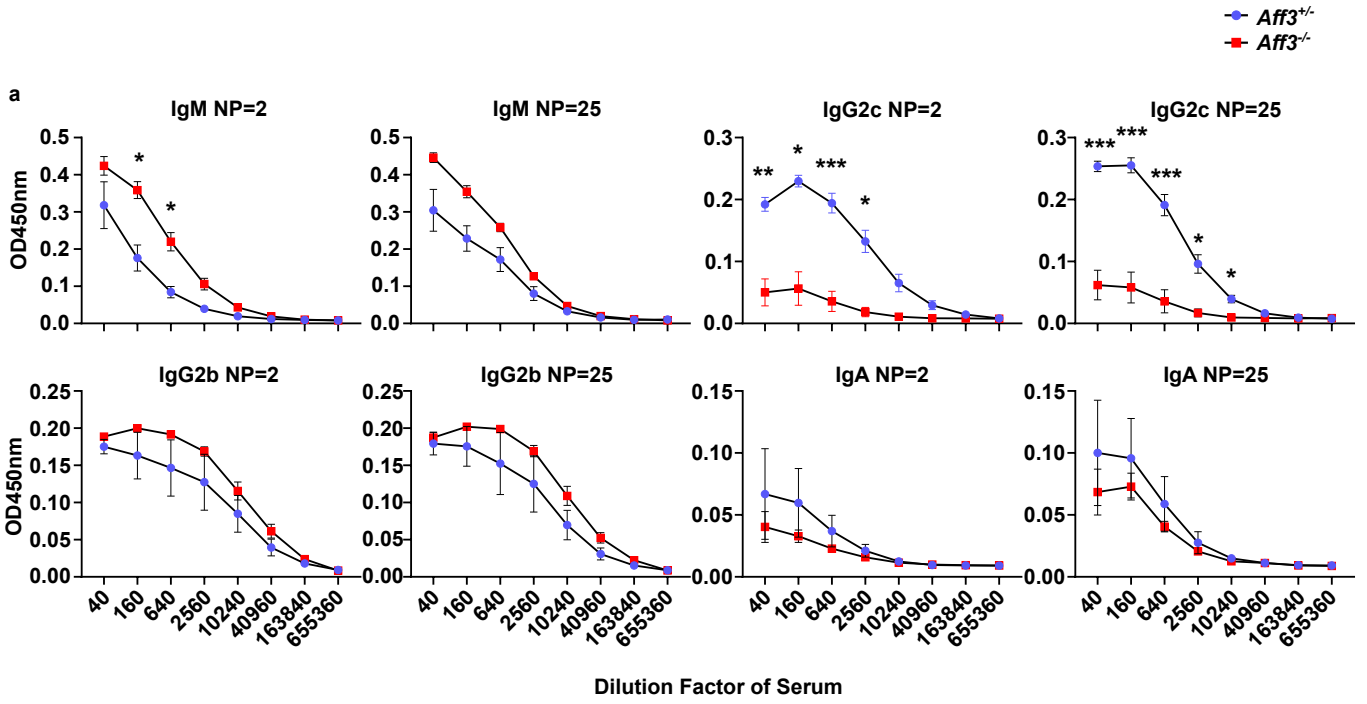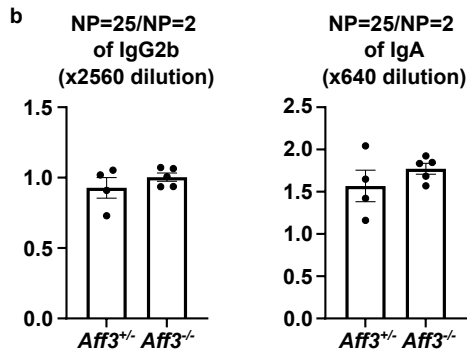

**Fig. S5.** Effects of *Aff3* deficiency on somatic hypermutation. Mice were immunized with NP-conjugated chicken gamma-globulin and complete Freund's adjuvant. Four weeks after immunization, the B-cell population and anti-NP antibodies were analyzed. (a) Anti-NP antibodies in serum (*Aff3*<sup>+/-</sup> n=4 [purple] and *Aff3*<sup>-/-</sup> n=5 [red]). NP=2 or NP=25 polymerized antigens were coated on the plate. The antibody titers were assessed by ELISA. (b) Statistical analysis of the ratios of anti-NP=25 to NP=2 antibody titers for IgG2b and IgA. The OD450 nm values of x2560 (IgG2b) or x640 (IgA) in Panel a were used for the analysis (n=4 or 5 in each group). In all panels, the data are shown as the mean ± SEM. \*, \*\*, \*\*\*, and \*\*\*\* indicate significant differences at p<0.05, 0.01, 0.005, and 0.001, respectively. The P values were calculated using multiple Welch's t tests with Holm-Sidak correction (a) or unpaired t tests with Welch's correction (b).

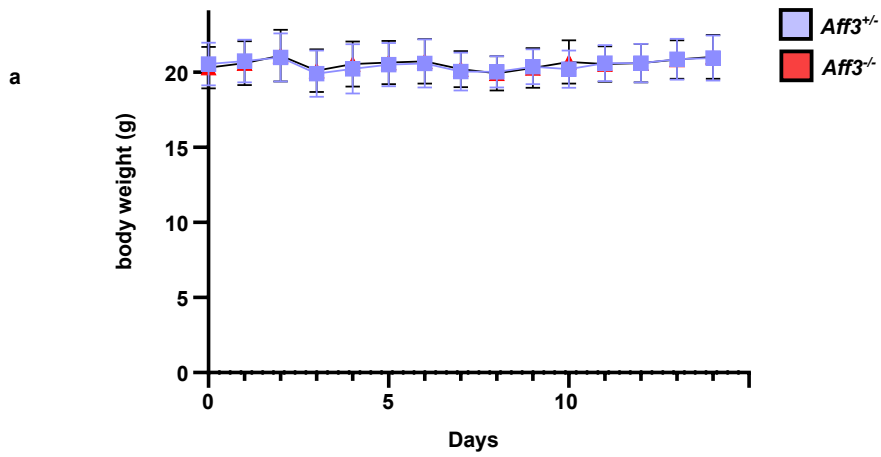

**b**

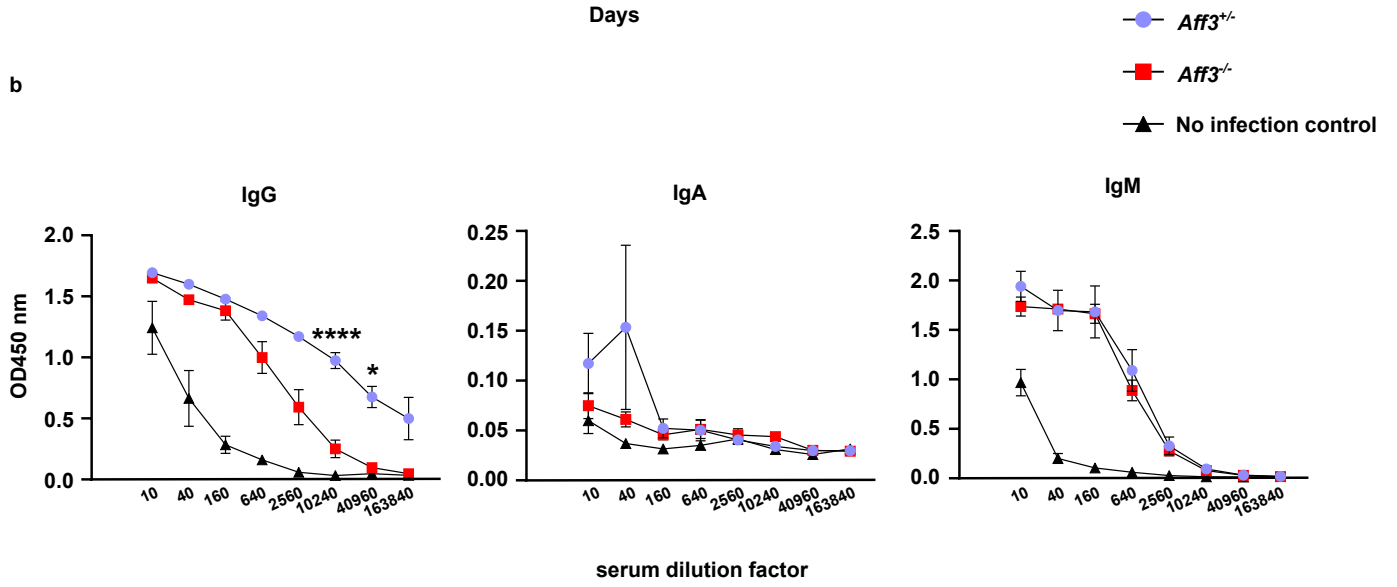

**Fig. S6.** Effects of *Aff3* deficiency on influenza infection in mice. (a) Body weights of mice after influenza virus infection (*Aff3*<sup>+/-</sup> (purple) and *Aff3*<sup>-/-</sup> (red), n=5 in each group). (b) Anti-influenza virus antibodies in serum were measured by ELISA at 14 days after infection (*Aff3*<sup>+/-</sup> n=5 [purple], *Aff3*<sup>-/-</sup> n=5 [red], and no-infection control n=2 [black]). In all panels, the data are shown as the mean ± SEM. \*, \*\*, \*\*\*, and \*\*\*\* indicate significant differences at p<0.05, 0.01, 0.005, and 0.001 between *Aff3*<sup>+/-</sup> and *Aff3*<sup>-/-</sup> mice, respectively. The P values were calculated using unpaired t tests with Welch's correction (a) or multiple Welch's t tests with Holm–Sidak correction (b).

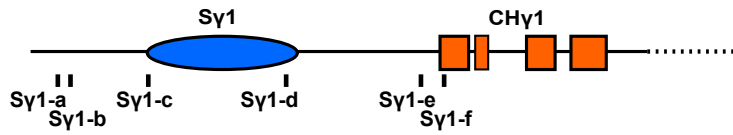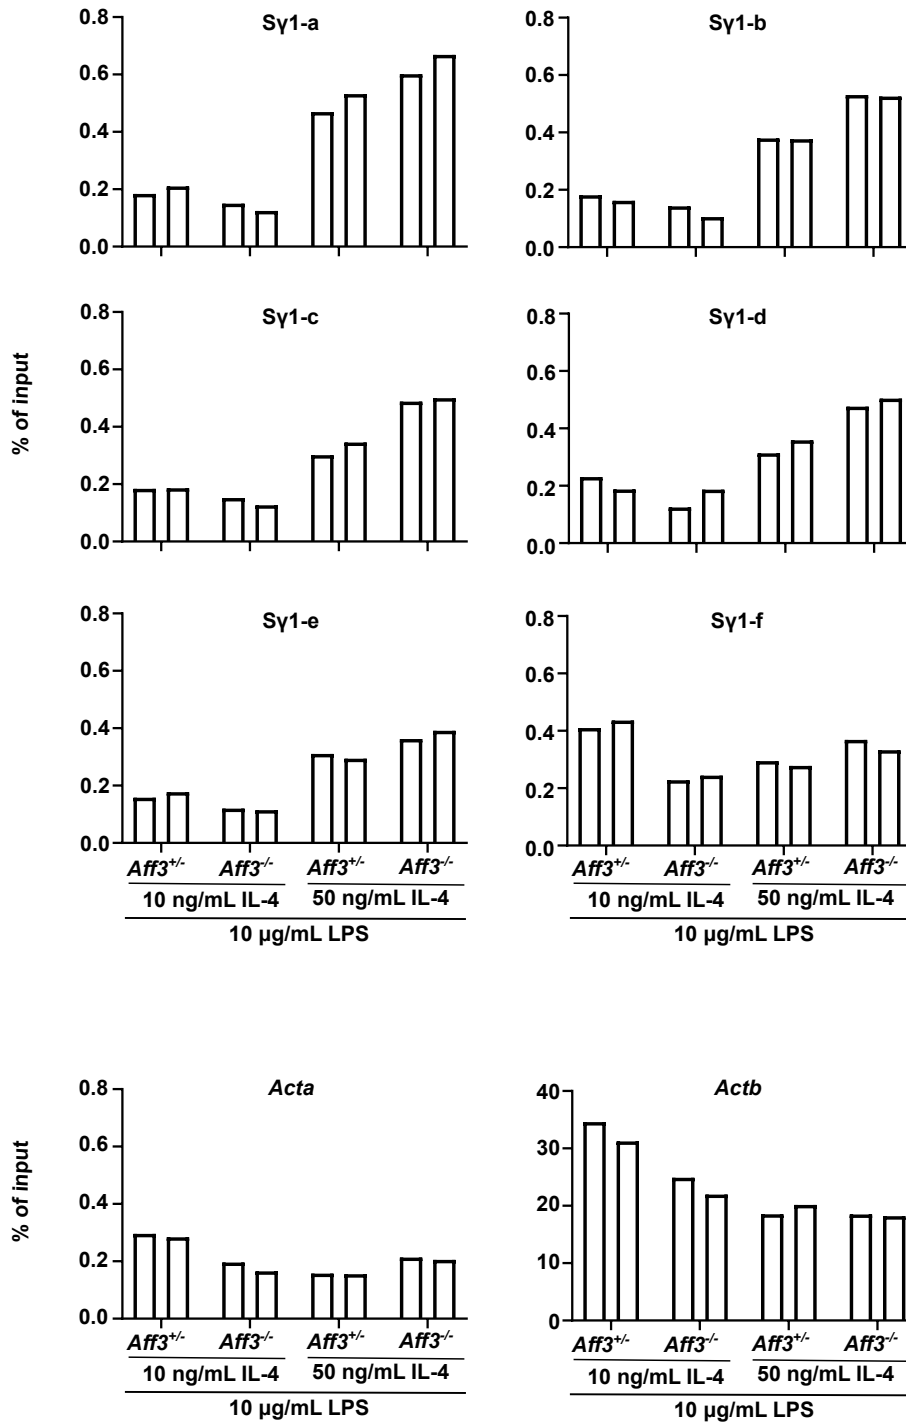

**Fig. S7.** ChIP–qPCR analysis of RNA polymerase II. CD43<sup>+</sup> B cells were harvested from *Aff3*<sup>+/-</sup> or *Aff3*<sup>-/-</sup> mice and cultured in the presence of 10 µg/mL LPS and 10 ng/mL IL-4. After 2 days of culture, ChIP–qPCR was performed with an anti-RNA polymerase II antibody and the primers indicated in the diagram and Table S4. *Acta* and *Actb* were used as the negative and positive controls, respectively. Duplicate data for each sample are shown.

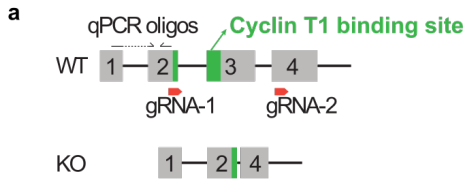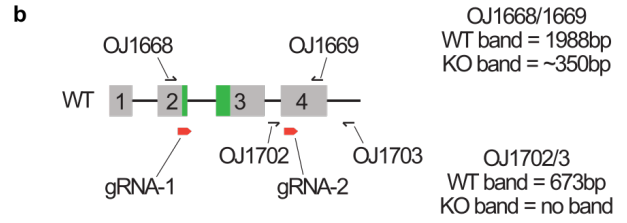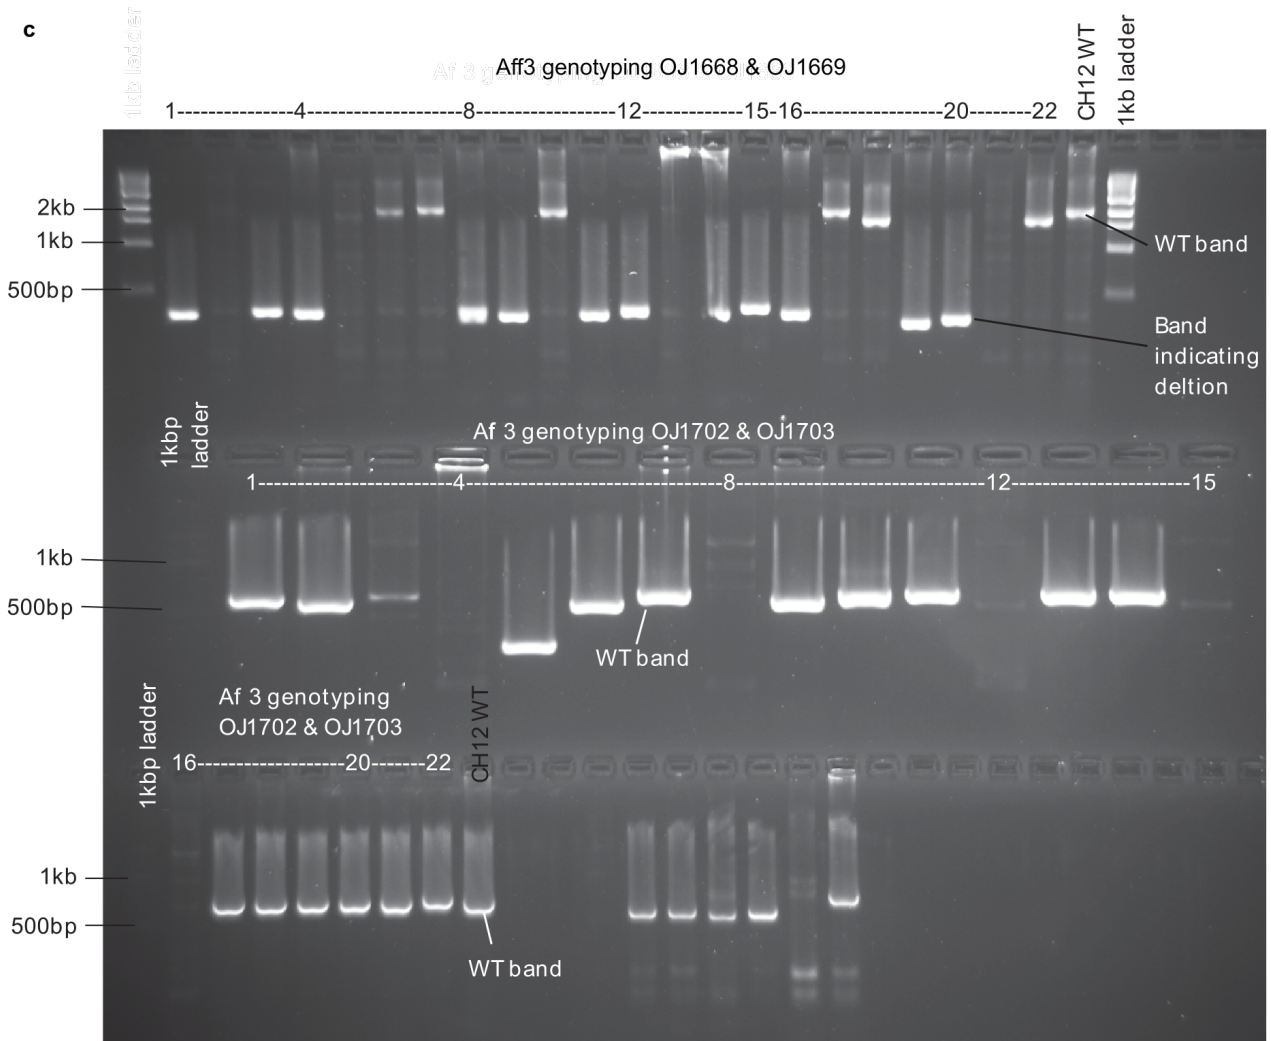



**Fig. S8.** Strategy of *Aff3* KO in CH12 cells. (a) Position of gRNA-1/2 and the predicted KO allele. The cyclin T1 binding site, which is thought to be important for AFF3 function, is shown in green. (b) Primers used for genotyping the *Aff3*-KO allele. The numbers in the gray boxes signify the exon numbers (a, b). (c) Agarose gel electrophoresis for genotyping. Clones 4, 15 and 16 were chosen for further analysis, as shown in Fig. 6. They were renamed clones 1, 2 and 3, respectively. The primers used in the experiments are listed in Table S4.

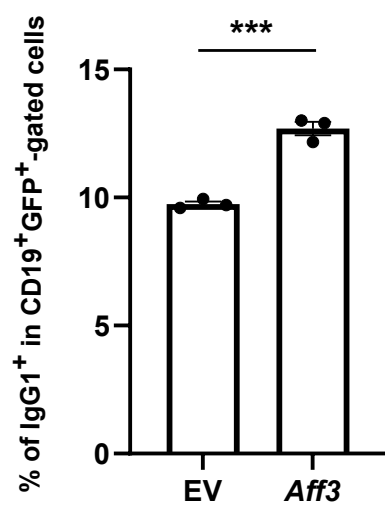

**Fig. S9.** Overexpression of the AFF3 protein increases class switching to IgG1. CD43<sup>-</sup> B cells were harvested from *Aff3*<sup>+/-</sup> mice and cultured with LPS and IL-4. The cDNA of *Aff3* was transduced into the cells with a retroviral vector carrying the GFP marker. After 4 days of culture, the cells were analyzed by flow cytometry. GFP<sup>+</sup>CD19<sup>+</sup> cells were gated, and the percentage of IgG1<sup>+</sup> cells was measured (n=3 in each group). EV indicates the empty vector. *Aff3* indicates the *Aff3* cDNA-containing vector. The data are shown as the mean ± SEM. \*, \*\*, \*\*\*, and \*\*\*\* indicate significant differences at p<0.05, 0.01, 0.005, and 0.001, respectively. The P values were calculated using unpaired t tests with Welch's correction. The data shown in this figure are representative of two experiments.

Extended Data Table 1. The rates of the switch regions in *Aff3*<sup>+/-</sup> and *Aff3*<sup>-/-</sup> B cells)

**Mutations in IgM switch region**

| <i>Aff3</i> <sup>+/-</sup> |                     |                       |                        |
|----------------------------|---------------------|-----------------------|------------------------|
|                            | mutated nucleotides | sequenced nucleotides | sequenced clone number |
| #1                         | 8                   | 5656                  | 15                     |
| #2                         | 3                   | 2665                  | 11                     |
| #3                         | 3                   | 4364                  | 12                     |
| <b>sum</b>                 | <b>14</b>           | <b>12685</b>          | <b>38</b>              |
| <b>total mutation rate</b> | 0.0011037           |                       |                        |

| <i>Aff3</i> <sup>-/-</sup> |                     |                       |                        |
|----------------------------|---------------------|-----------------------|------------------------|
|                            | mutated nucleotides | sequenced nucleotides | sequenced clone number |
| #1                         | 9                   | 4995                  | 13                     |
| #2                         | 6                   | 3205                  | 11                     |
| #3                         | 5                   | 4443                  | 14                     |
| <b>sum</b>                 | <b>20</b>           | <b>12643</b>          | <b>38</b>              |
| <b>total mutation rate</b> | 0.0015819           |                       |                        |

**Mutations in IgG1 switch region**

| <i>Aff3</i> <sup>+/-</sup> |                     |                       |                        |
|----------------------------|---------------------|-----------------------|------------------------|
|                            | mutated nucleotides | sequenced nucleotides | sequenced clone number |
| #1                         | 6                   | 4536                  | 11                     |
| #2                         | 5                   | 3822                  | 9                      |
| #3                         | 3                   | 2399                  | 9                      |
| <b>sum</b>                 | <b>14</b>           | <b>10757</b>          | <b>29</b>              |
| <b>total mutation rate</b> | 0.0013015           |                       |                        |

| <i>Aff3</i> <sup>-/-</sup> |                     |                       |                        |
|----------------------------|---------------------|-----------------------|------------------------|
|                            | mutated nucleotides | sequenced nucleotides | sequenced clone number |
| #1                         | 2                   | 9237                  | 15                     |
| #2                         | 0                   | 2696                  | 4                      |
| #3                         | 0                   | 4055                  | 10                     |
| <b>sum</b>                 | <b>2</b>            | <b>15988</b>          | <b>29</b>              |
| <b>total mutation rate</b> | 0.0001251           |                       |                        |

Extended Data Table 2. antibodies used in flow cytometry

| <b>Antibody</b>                       | <b>SOURCE</b>  | <b>IDNETIFIER</b> |
|---------------------------------------|----------------|-------------------|
| PB anti-CD4 , clone RM4.5             | Biolegend      | 100531            |
| FITC anti-CD4, clone GK1.5            | BD Biosciences | 553729            |
| V500 anti-CD8 $\alpha$ , clone 53-6.7 | Biolegend      | 100752            |
| PE anti-TCR $\beta$ , clone H57-597   | Biolegend      | 109208            |
| PB anti-CD62L, clone MEL-14           | Biolegend      | 104424            |
| PECy7 anti-CD44, clone IM7            | Biolegend      | 103030            |
| APC anti-CD25, clone PC61.5           | Invitrogen     | 47-0251-82        |
| APC anti-IFN $\gamma$ , clone XMG1.2  | Biolegend      | 505810            |
| PECy7 anti-CD19, clone 6D5            | Biolegend      | 11520             |
| APC anti-CD19, clone 6D5              | Biolegend      | 115512            |
| PECy7 anti-CD23, clone B3B4           | Biolegend      | 101614            |
| PE anti-CD21, clone eBio879           | eBioscience    | 12-0211-083       |
| PE anti-CD138, clone 281-2            | BD Biosciences | 553714            |
| PB anti-CD73, clone TY/11.8           | Biolegend      | 127217            |
| APC anti-IgG1, clone RMG1-1           | Biolegend      | 406609            |
| BV421 anti-IgG3, clone R40-82         | BD Biosciences | 565808            |
| biotin anti-IgG2c, clone 5.7          | BD Biosciences | 553504            |
| APC streptavidin                      | Biolegend      | 405207            |
| APC anti-CD86, clone PO3              | Biolegend      | 105114            |

Extended Data Table 3. Catalog numbers of antibodies for ELISA

All antibodies in this table were purchased from Bethyl laboratories

|       | capture antibody                    | detection antibody (HRP-cojugated)  |
|-------|-------------------------------------|-------------------------------------|
| IgM   | goat polyclonal (Cat. No. A90-101A) | goat polyclonal (Cat. No. A90-101P) |
| IgG1  | goat polyclonal (Cat. No. A90-105A) | goat polyclonal (Cat. No. A90-105P) |
| IgG2b | goat polyclonal (Cat. No. A90-109A) | goat polyclonal (Cat. No. A90-109P) |
| IgG2c | goat polyclonal (Cat. No. A90-136A) | goat polyclonal (Cat. No. A90-136P) |
| IgG3  | goat polyclonal (Cat. No. A90-111A) | goat polyclonal (Cat. No. A90-111P) |
| IgA   | goat polyclonal (Cat. No. A90-103A) | goat polyclonal (Cat. No. A90-103P) |

Extended Data Table 4. oligonucleotides used in this paper

| Oligonucleotide                                  | Sequence                            | Reference                             |
|--------------------------------------------------|-------------------------------------|---------------------------------------|
| <i>Aff3</i> fwd for cloning (Fig3d)              | CCCACCATGGACAGCTTC                  |                                       |
| <i>Aff3</i> rev for cloning (Fig3d)              | CAGTCTGGCTCAAAGGCTTG                |                                       |
| <i>Aff1</i> fwd for cloning (Fig3d)              | CACTTAATGGAAACGAGGATTCTC            |                                       |
| <i>Aff1</i> rev for cloning (Fig3d)              | CTTCCAATGGTGCAGAGACA                |                                       |
| <i>Aff4</i> fwd for cloning (Fig3d)              | AACATGAACCGTGAAGACCGG               |                                       |
| <i>Aff4</i> rev for cloning (Fig3d)              | TGGCAGTTTTCTTTGTGATG                |                                       |
| <i>Aicda</i> fwd (Fig4c)                         | ATCGGGATCATGACCTTCAA                |                                       |
| <i>Aicda</i> rev (Fig4c)                         | GCCGAAGTTGTCTGGTTAGC                |                                       |
| <i>Acta</i> fwd (Fig4d, FigS7)                   | CTTCTCCATGTCGTCCCAGT                |                                       |
| <i>Acta</i> rev (Fig4d, FigS7)                   | GGACTCCTACGTGGGTGATG                |                                       |
| <i>S<sub>μ</sub></i> SR fwd (Fig4d)              | TGGCCAGAACCAGAATCAATT               | Xu J <i>et al.</i> (70)               |
| <i>S<sub>μ</sub></i> SR rev (Fig4d)              | GCCTCACATAATCCATGTCAGCTA            | Xu J <i>et al.</i> (70)               |
| <i>Tbp</i> fwd (Fig4c, 5a, S2c)                  | CTCAGTTACAGGTGGCAGCA                |                                       |
| <i>Tbp</i> rev (Fig4c, 5a, S2c)                  | CAGCACAGAGCAAGCAACTC                |                                       |
| <i>Sy1-c</i> fwd (Fig4d, FigS7)                  | CCTCAGCTCTTTTGCAGGTG                |                                       |
| <i>Sy1-c</i> rev (Fig4d, FigS7)                  | AAGTAGAGGGAAGCCCAAGC                |                                       |
| <i>Sy1-d</i> fwd (Fig4d, FigS7)                  | CTTGCTCCTAAGGCACTGCT                |                                       |
| <i>Sy1-d</i> rev (Fig4d, FigS7)                  | CAGCCAGGAGAAATGGAAGA                |                                       |
| <i>Sy1</i> germline fwd (Fig5a)                  | GGATCCAGAGTTCAGGTCACT               |                                       |
| <i>Sy1</i> germline rev (Fig5a)                  | GGCCTCCTAGACAAGCACAG                |                                       |
| <i>Sy1</i> postswitch fwd (Fig5a)                | TCTGGACCTCTCCGAAACCA                | Lin L <i>et al.</i> (71)              |
| <i>Sy1</i> postswitch rev (Fig5a)                | GGATCCAGAGTTCAGGTCACT               | Wang NS <i>et al.</i> (72)            |
| <i>S<sub>μ</sub>-Sy1-SR</i> fwd (Fig5b)          | AATGGATACCTCAGTGGTTTTTAATGGTGGGTTTA | Reina-San-Martin B <i>et al.</i> (73) |
| <i>S<sub>μ</sub>-Sy1-SR</i> rev (Fig5b)          | AACTACTAAACTTGTACCTGTCTGGCACC       | Denkelmann M <i>et al.</i> (74)       |
| <i>Cd19</i> fwd (Fig5b)                          | AATGTTGTGCTGCCATGCCTC               | Rickert RC <i>et al.</i> (75)         |
| <i>Cd19</i> rev (Fig5b)                          | GTCTGAAGCATTCCACCGGAA               | Rickert RC <i>et al.</i> (75)         |
| <i>Aicda</i> for qRT-PCR (Fig6a)                 | GCCACCTTCGCAACAAGTCT                |                                       |
| <i>Aicda</i> for qRT-PCR (Fig6a)                 | CCGGGCACAGTCATAGCAC                 |                                       |
| <i>S<sub>μ</sub></i> GLT fwd for qRT-PCR (Fig6a) | TAGTAAGCGAGGCTCTAAAAAGCAC           |                                       |
| <i>S<sub>μ</sub></i> GLT rev for qRT-PCR (Fig6a) | ACTCAGAGAAGCCACCCAT                 |                                       |
| <i>S<sub>α</sub></i> GLT fwd for qRT-PCR(Fig6a)  | GGCTAGAATGGGCTAGAGTGAGTTA           |                                       |
| <i>S<sub>α</sub></i> GLT rev for qRT-PCR(Fig6a)  | GCCTATTTTGGCCAGTCTACTTAC            |                                       |
| <i>S<sub>μ</sub>-P</i> fwd (Fig6d)               | CCACCTGGGTAATTTGCATTTTC             | Methot <i>et al.</i> (52)             |
| <i>S<sub>μ</sub>-P</i> rev (Fig6d)               | GGGAAACTAGAACTACTCAAGCTAA           | Methot <i>et al.</i> (52)             |
| <i>S<sub>μ</sub>-a</i> fwd (Fig6d)               | TAGTAAGCGAGGCTCTAAAAAGCAC           | Cortizas <i>et al.</i> (76)           |
| <i>S<sub>μ</sub>-a</i> rev (Fig6d)               | ACTCAGAGAAGCCACCCAT                 | Cortizas <i>et al.</i> (76)           |
| <i>S<sub>μ</sub>-b</i> fwd (Fig6d)               | GGTTGGGAGACCATGAATTG                | Cortizas <i>et al.</i> (76)           |
| <i>S<sub>μ</sub>-b</i> rev (Fig6d)               | TTCTTAGCTCAACCCAGTTTTATCC           | Cortizas <i>et al.</i> (76)           |
| <i>S<sub>α</sub>-a</i> fwd (Fig6d)               | AAGCAGGCCTGGGGTGGACA                | Methot <i>et al.</i> (52)             |
| <i>S<sub>α</sub>-a</i> rev (Fig6d)               | AGCAAGCTCAGCCAGCCTAA                | Methot <i>et al.</i> (52)             |
| <i>S<sub>α</sub>-b</i> fwd (Fig6d)               | CTTGGCTAGGCTACAATGGATTGAGC          | Cortizas <i>et al.</i> (76)           |
| <i>S<sub>α</sub>-b</i> rev (Fig6d)               | GTGCAACTCTATCTAGGTCTGCCCGGT         | Cortizas <i>et al.</i> (76)           |
| gRNA <i>Aff3</i> target 1 (FigS2a)               | CCTCGTGAGGGGGATGACATTCC             |                                       |
| gRNA <i>Aff3</i> target 2 (FigS2a)               | CCACTCGATAGGTCCGAGGAAAAG            |                                       |
| <i>Aff3</i> fwd for qRT-PCR (FigS2a, S2c)        | CACCGTCCGATGGCCAACA                 |                                       |
| <i>Aff3</i> rev for qRT-PCR (FigS2a, S2c)        | GGGGGAAAGTTCTGAACACA                |                                       |
| <i>Sy1-a</i> fwd (FigS7)                         | CCTGTAGTCCATGCCAAACA                |                                       |
| <i>Sy1-a</i> rev (FigS7)                         | GGCCTCCTAGACAAGCACAG                |                                       |
| <i>Sy1-b</i> fwd (FigS7)                         | TGCAGGTCTTGTGTCTGAG                 |                                       |
| <i>Sy1-b</i> rev (FigS7)                         | TCCCAGCATTGGGATTAGAG                |                                       |
| <i>Sy1-e</i> fwd (FigS7)                         | TCTGATGTGGGCATCTGTGT                |                                       |
| <i>Sy1-e</i> rev (FigS7)                         | GATGTGCCGACTTCAATGTG                |                                       |
| <i>Sy1-f</i> fwd (FigS7)                         | GGATCCAGAGTTCAGGTCA                 |                                       |
| <i>Sy1-f</i> rev (FigS7)                         | CGACACCCCCATCTGTCTAT                |                                       |
| <i>Actb</i> fwd (FigS7)                          | CAGCTTCTTTGCAGCTCCTT                |                                       |
| <i>Actb</i> rev (FigS7)                          | GGACCCCTGCAGTGAGGTACT               |                                       |
| gRNA <i>Aff3</i> exon 2 target sequence (FigS8)  | AGCGAACCCTACAAGGTAGA                |                                       |
| gRNA <i>Aff3</i> exon 4 target sequence (FigS8)  | AAGTGTGCAATATGGAGACG                |                                       |
| genotyping <i>Aff3</i> OJ1668 (FigS8)            | TCAGATGTACATGACTTTGGGC              |                                       |
| genotyping <i>Aff3</i> OJ1669 (FigS8)            | TTAGGAGATTTCGTAGGAGCTT              |                                       |
| genotyping <i>Aff3</i> OJ1703 (FigS8)            | GCCACAATGCAAAACCTGTTCA              |                                       |
| genotyping <i>Aff3</i> OJ1703 (FigS8)            | AGGAGGCATTCCATCGCTAAGT              |                                       |

Extended Data Table 5. abbreviation of cell types in Fig7a

|              |                                                            |
|--------------|------------------------------------------------------------|
| naive CD4    | naive CD4 cells                                            |
| Mem CD4      | Memory CD4 cells                                           |
| Th1          | T helper 1 cells                                           |
| Th2          | T helper 2 cells                                           |
| Th17         | T helper 17 cells                                          |
| Tfh          | T follicular helper cells                                  |
| Fr. I nTreg  | Fraction I naive regulatory T cells                        |
| Fr. II eTreg | Fraction II effector regulatory T cells                    |
| Fr. III T    | Fraction III non-regulatory T cells                        |
| Naive CD8    | Naive CD8                                                  |
| CM CD8       | Central memory CD8 T cells                                 |
| EM CD8       | Effector memory CD8 T cells                                |
| TEMRA CD8    | CD8 <sup>+</sup> effector memory CD45RA <sup>+</sup> cells |
| NK           | Natural killer cells                                       |
| Naive B      | Naive B cells                                              |
| USM B        | Unswitched memory B cells                                  |
| SM B         | Switched memory B cells                                    |
| Plasmablast  | Plasmablasts                                               |
| DN B         | Double negative B cells (IgD-negative, CD27-negative)      |
| CL Mono      | Classical monocytes                                        |
| CD16p Mono   | CD16 positive monocytes                                    |
| Int Mono     | Intermediate monocytes                                     |
| NC Mono      | Non-classical monocytes                                    |
| mDC          | Myeloid dendritic cells                                    |
| pDC          | Plasmacytoid dendritic cells                               |
| Neu          | Neutrophils                                                |
| LDG          | Low-density granulocytes                                   |



## REFERENCES AND NOTES

1. W. R. Reay, M. J. Cairns, Advancing the use of genome-wide association studies for drug repurposing. *Nat. Rev. Genet.* **22**, 658–671 (2021).
2. M. Claussnitzer, J. H. Cho, R. Collins, N. J. Cox, E. T. Dermitzakis, M. E. Hurles, S. Kathiresan, E. E. Kenny, C. M. Lindgren, D. G. MacArthur, K. N. North, S. E. Plon, H. L. Rehm, N. Risch, C. N. Rotimi, J. Shendure, N. Soranzo, M. I. McCarthy, A brief history of human disease genetics. *Nature* **577**, 179–189 (2020).
3. X. Bai, J. Kim, Z. Yang, M. J. Jurynek, T. E. Akie, J. Lee, J. LeBlanc, A. Sessa, H. Jiang, A. DiBiase, Y. Zhou, D. J. Grunwald, S. Lin, A. B. Cantor, S. H. Orkin, L. I. Zon, TIF1 $\gamma$  controls erythroid cell fate by regulating transcription elongation. *Cell* **142**, 133–143 (2010).
4. V. Cavalleri, L. R. Bettini, C. Barboni, A. Cereda, M. Mariani, M. Spinelli, C. Gervasini, S. Russo, A. Biondi, M. Jankovic, A. Selicorni, Thrombocytopenia and Cornelia de Lange syndrome: Still an enigma? *Am. J. Med. Genet. A.* **170**, 130–134 (2016).
5. A. Al Ismail, A. Husain, M. Kobayashi, T. Honjo, N. A. Begum, Depletion of recombination-specific cofactors by the C-terminal mutant of the activation-induced cytidine deaminase causes the dominant negative effect on class switch recombination. *Int. Immunol.* **29**, 525–537 (2017).
6. R. Casellas, U. Basu, W. T. Yewdell, J. Chaudhuri, D. F. Robbiani, J. M. Di Noia, Mutations, kataegis and translocations in B cells: Understanding AID promiscuous activity. *Nat. Rev. Immunol.* **16**, 164–176 (2016).

7. P. B. Chen, H. V. Chen, D. Acharya, O. J. Rando, T. G. Fazzio, R loops regulate promoter-proximal chromatin architecture and cellular differentiation. *Nat. Struct. Mol. Biol.* **22**, 999–1007 (2015).
8. K. Assing, C. Nielsen, M. Kirchhoff, H. O. Madsen, L. P. Ryder, N. Fisker, CD4+ CD31+ recent thymic emigrants in CHD7 haploinsufficiency (CHARGE syndrome): A case. *Hum. Immunol.* **74**, 1047–1050 (2013).
9. S. Bottardi, L. Mavoungou, E. Milot, IKAROS: A multifunctional regulator of the polymerase II transcription cycle. *Trends Genet.* **31**, 500–508 (2015).
10. W. J. Astle, H. Elding, T. Jiang, D. Allen, D. Ruklisa, A. L. Mann, D. Mead, H. Bouman, F. Riveros-Mckay, M. A. Kostadima, J. J. Lambourne, S. Sivapalaratnam, K. Downes, K. Kundu, L. Bomba, K. Berentsen, J. R. Bradley, L. C. Daugherty, O. Delaneau, K. Freson, S. F. Garner, L. Grassi, J. Guerrero, M. Haimel, E. M. Janssen-Megens, A. Kaan, M. Kamat, B. Kim, A. Mandoli, J. Marchini, J. H. A. Martens, S. Meacham, K. Megy, J. O’Connell, R. Petersen, N. Sharifi, S. M. Sheard, J. R. Staley, S. Tuna, M. van der Ent, K. Walter, S.-Y. Wang, E. Wheeler, S. P. Wilder, V. Iotchkova, C. Moore, J. Sambrook, H. G. Stunnenberg, E. Di Angelantonio, S. Kaptoge, T. W. Kuijpers, E. Carrillo-de-Santa-Pau, D. Juan, D. Rico, A. Valencia, L. Chen, B. Ge, L. Vasquez, T. Kwan, D. Garrido-Martín, S. Watt, Y. Yang, R. Guigo, S. Beck, D. S. Paul, T. Pastinen, D. Bujold, G. Bourque, M. Frontini, J. Danesh, D. J. Roberts, W. H. Ouwehand, A. S. Butterworth, N. Soranzo, The allelic landscape of human blood cell trait variation and links to common complex disease. *Cell* **167**, 1415–1429.e19 (2016).
11. C. Polychronakos, Q. Li, Understanding type 1 diabetes through genetics: Advances and prospects. *Nat. Rev. Genet.* **12**, 781–792 (2011).

12. C. Ma, L. M. Staudt, LAF-4 encodes a lymphoid nuclear protein with transactivation potential that is homologous to AF-4, the gene fused to MLL in t(4;11) leukemias. *Blood* **87**, 734–745 (1996).
13. M. Hiwatari, T. Taki, T. Taketani, M. Taniwaki, K. Sugita, M. Okuya, M. Eguchi, K. Ida, Y. Hayashi, Fusion of an AF4-related gene, LAF4, to MLL in childhood acute lymphoblastic leukemia with t(2;11)(q11;q23). *Oncogene* **22**, 2851–2855 (2003).
14. Z. Luo, C. Lin, E. Guest, A. S. Garrett, N. Mohaghegh, S. Swanson, S. Marshall, L. Florens, M. P. Washburn, A. Shilatifard, The super elongation complex family of RNA polymerase II elongation factors: Gene target specificity and transcriptional output. *Mol. Cell. Biol.* **32**, 2608–2617 (2012).
15. N. He, M. Liu, J. Hsu, Y. Xue, S. Chou, A. Burlingame, N. J. Krogan, T. Alber, Q. Zhou, HIV-1 Tat and host AFF4 recruit two transcription elongation factors into a bifunctional complex for coordinated activation of HIV-1 transcription. *Mol. Cell* **38**, 428–438 (2010).
16. F. X. Chen, E. R. Smith, A. Shilatifard, Born to run: Control of transcription elongation by RNA polymerase II. *Nat. Rev. Mol. Cell Biol.* **19**, 464–478 (2018).
17. ENCODE Project Consortium, An integrated encyclopedia of DNA elements in the human genome. *Nature* **489**, 57–74 (2012).
18. Z. Luo, C. Lin, A. R. Woodfin, E. T. Bartom, X. Gao, E. R. Smith, A. Shilatifard, Regulation of the imprinted Dlk1-Dio3 locus by allele-specific enhancer activity. *Genes Dev.* **30**, 92–101 (2016).
19. Y. Zhang, C. Wang, X. Liu, Q. Yang, H. Ji, M. Yang, M. Xu, Y. Zhou, W. Xie, Z. Luo, C. Lin, AFF3-DNA methylation interplay in maintaining the mono-allelic expression pattern of *XIST* in terminally differentiated cells. *J. Mol. Cell Biol.*, 761–769 (2019).

20. D. S. W. Lee, O. L. Rojas, J. L. Gommerman, B cell depletion therapies in autoimmune disease: Advances and mechanistic insights. *Nat. Rev. Drug Discov.* **20**, 179–199 (2021).
21. S. J. S. Rubin, M. S. Bloom, W. H. Robinson, B cell checkpoints in autoimmune rheumatic diseases. *Nat. Rev. Rheumatol.* **15**, 303–315 (2019).
22. T. Saha, D. Sundaravinayagam, M. Di Virgilio, Charting a DNA repair roadmap for immunoglobulin class switch recombination. *Trends Biochem. Sci.* **46**, 184–199 (2021).
23. Z. Chen, J. H. Wang, Signaling control of antibody isotype switching. *Adv. Immunol.* **141**, 105–164 (2019).
24. Y. Feng, N. Seija, J. M. Di Noia, A. Martin, AID in antibody diversification: There and back again. *Trends Immunol.* **41**, 586–600 (2020).
25. K. Yu, M. R. Lieber, Current insights into the mechanism of mammalian immunoglobulin class switch recombination. *Crit. Rev. Biochem. Mol. Biol.* **54**, 333–351 (2019).
26. A. L. Kenter, S. Kumar, R. Wuerffel, F. Grigera, AID hits the jackpot when missing the target. *Curr. Opin. Immunol.* **39**, 96–102 (2016).
27. M. D. Fortune, H. Guo, O. Burren, E. Schofield, N. M. Walker, M. Ban, S. J. Sawcer, J. Bowes, J. Worthington, A. Barton, S. Eyre, J. A. Todd, C. Wallace, Statistical colocalization of genetic risk variants for related autoimmune diseases in the context of common controls. *Nat. Genet.* **47**, 839–846 (2015).
28. S. N. Lewis, E. Nsoesie, C. Weeks, D. Qiao, L. Zhang, Prediction of disease and phenotype associations from genome-wide association studies. *PLOS ONE* **6**, e27175 (2011).

29. A. Hertweck, C. M. Evans, M. Eskandarpour, J. C. H. Lau, K. Oleinika, I. Jackson, A. Kelly, J. Ambrose, P. Adamson, D. J. Cousins, P. Lavender, V. L. Calder, G. M. Lord, R. G. Jenner, T-bet activates Th1 genes through mediator and the super elongation complex. *Cell Rep.* **15**, 2756–2770 (2016).
30. R. Chen, S. Bélanger, M. A. Frederick, B. Li, R. J. Johnston, N. Xiao, Y.-C. Liu, S. Sharma, B. Peters, A. Rao, S. Crotty, M. E. Pipkin, In vivo RNA interference screens identify regulators of antiviral CD4(+) and CD8(+) T cell differentiation. *Immunity* **41**, 325–338 (2014).
31. C. Demarta-Gatsi, L. Smith, S. Thiberge, R. Peronet, P. H. Commere, M. Matondo, L. Apetoh, P. Bruhns, R. Ménard, S. Mécheri, Protection against malaria in mice is induced by blood stage-arresting histamine-releasing factor (HRF)-deficient parasites. *J. Exp. Med.* **213**, 1419–1428 (2016).
32. W. I. White, C. B. Evans, D. W. Taylor, Antimalarial antibodies of the immunoglobulin G2a isotype modulate parasitemias in mice infected with *Plasmodium yoelii*. *Infect. Immun.* **59**, 3547–3554 (1991).
33. S. Waki, S. Uehara, K. Kanbe, H. Nariuch, M. Suzuki, Interferon-gamma and the induction of protective IgG2a antibodies in non-lethal *Plasmodium berghei* infections of mice. *Parasite Immunol.* **17**, 503–508 (1995).
34. R. A. Cavinato, K. R. B. Bastos, L. R. Sardinha, R. M. Elias, J. M. Alvarez, M. R. D’Império Lima, Susceptibility of the different developmental stages of the asexual (schizogonic) erythrocyte cycle of *Plasmodium chabaudi chabaudi* to hyperimmune serum, immunoglobulin (Ig)G1, IgG2a and F(ab’)<sub>2</sub> fragments. *Parasite Immunol.* **23**, 587–597 (2001).

35. Q. Wang, K. R. Kieffer-Kwon, T. Y. Oliveira, C. T. Mayer, K. Yao, J. Pai, Z. Cao, M. Dose, R. Casellas, M. Jankovic, M. C. Nussenzweig, D. F. Robbiani, The cell cycle restricts activation-induced cytidine deaminase activity to early G1. *J. Exp. Med.* **214**, 49–58 (2017).
36. S. Chou, H. Upton, K. Bao, U. Schulze-Gahmen, A. J. Samelson, N. He, A. Nowak, H. Lu, N. J. Krogan, Q. Zhou, T. Alber, HIV-1 Tat recruits transcription elongation factors dispersed along a flexible AFF4 scaffold. *Proc. Natl. Acad. Sci. U.S.A.* **110**, E123–E131 (2013).
37. S. Qi, Z. Li, U. Schulze-Gahmen, G. Stjepanovic, Q. Zhou, J. H. Hurley, Structural basis for ELL2 and AFF4 activation of HIV-1 proviral transcription. *Nat. Commun.* **8**, 14076 (2017).
38. N. He, C. K. Chan, B. Sobhian, S. Chou, Y. Xue, M. Liu, T. Alber, M. Benkirane, Q. Zhou, Human polymerase-associated factor complex (PAFc) connects the super elongation complex (SEC) to RNA polymerase II on chromatin. *Proc. Natl. Acad. Sci. U.S.A.* **108**, E636–E645 (2011).
39. R. Pavri, R loops in the regulation of antibody gene diversification. *Genes* **8**, 154 (2017).
40. C. Ribeiro de Almeida, S. Dhir, A. Dhir, A. E. Moghaddam, Q. Sattentau, A. Meinhart, N. J. Proudfoot, RNA helicase DDX1 converts RNA G-quadruplex structures into R-loops to promote IgH class switch recombination. *Mol. Cell* **70**, 650–662.e8 (2018).
41. N. A. Begum, N. Izumi, M. Nishikori, H. Nagaoka, R. Shinkura, T. Honjo, Requirement of non-canonical activity of uracil DNA glycosylase for class switch recombination. *J. Biol. Chem.* **282**, 731–742 (2007).
42. W. T. Yewdell, Y. Kim, P. Chowdhury, C. M. Lau, R. M. Smolkin, K. T. Belcheva, K. C. Fernandez, M. Cols, W. F. Yen, B. Vaidyanathan, D. Angeletti, A. B. McDermott, J. W. Yewdell, J.

- C. Sun, J. Chaudhuri, A hyper-IgM syndrome mutation in activation-induced cytidine deaminase disrupts G-quadruplex binding and genome-wide chromatin localization. *Immunity* **53**, 952–970.e11 (2020).
43. M. Ota, Y. Nagafuchi, H. Hatano, K. Ishigaki, C. Terao, Y. Takeshima, H. Yanaoka, S. Kobayashi, M. Okubo, H. Shirai, Y. Sugimori, J. Maeda, M. Nakano, S. Yamada, R. Yoshida, H. Tsuchiya, Y. Tsuchida, S. Akizuki, H. Yoshifuji, K. Ohmura, T. Mimori, K. Yoshida, D. Kurosaka, M. Okada, K. Setoguchi, H. Kaneko, N. Ban, N. Yabuki, K. Matsuki, H. Mutoh, S. Oyama, M. Okazaki, H. Tsunoda, Y. Iwasaki, S. Sumitomo, H. Shoda, Y. Kochi, Y. Okada, K. Yamamoto, T. Okamura, K. Fujio, Dynamic landscape of immune cell-specific gene regulation in immune-mediated diseases. *Cell* **184**, 3006–3021.e17 (2021).
44. A. Buniello, J. A. L. MacArthur, M. Cerezo, L. W. Harris, J. Hayhurst, C. Malangone, A. McMahon, J. Morales, E. Mountjoy, E. Sollis, D. Suveges, O. Vrousseau, P. L. Whetzel, R. Amode, J. A. Guillen, H. S. Riat, S. J. Trevanion, P. Hall, H. Junkins, P. Flicek, T. Burdett, L. A. Hindorf, F. Cunningham, H. Parkinson, The NHGRI-EBI GWAS Catalog of published genome-wide association studies, targeted arrays and summary statistics 2019. *Nucleic Acids Res.* **47**, D1005–D1012 (2019).
45. V. Orrù, M. Steri, C. Sidore, M. Marongiu, V. Serra, S. Olla, G. Sole, S. Lai, M. Dei, A. Mulas, F. Viridis, M. G. Piras, M. Lobina, M. Marongiu, M. Pitzalis, F. Deidda, A. Loizedda, S. Onano, M. Zoledziwska, S. Sawcer, M. Devoto, M. Gorospe, G. R. Abecasis, M. Floris, M. Pala, D. Schlessinger, E. Fiorillo, F. Cucca, Complex genetic signatures in immune cells underlie autoimmunity and inform therapy. *Nat. Genet.* **52**, 1036–1045 (2020).

46. C. Lin, E. R. Smith, H. Takahashi, K. C. Lai, S. Martin-Brown, L. Florens, M. P. Washburn, J. W. Conaway, R. C. Conaway, A. Shilatifard, AFF4, a component of the ELL/P-TEFb elongation complex and a shared subunit of MLL chimeras, can link transcription elongation to leukemia. *Mol. Cell* **37**, 429–437 (2010).
47. J. N. Pucella, J. Chaudhuri, AID invited to the G4 summit. *Mol. Cell* **67**, 355–357 (2017).
48. Q. Qiao, L. Wang, F.-L. Meng, J. K. Hwang, F. W. Alt, H. Wu, AID recognizes structured DNA for class switch recombination. *Mol. Cell* **67**, 361–373.e4 (2017).
49. E. Pefanis, J. Wang, G. Rothschild, J. Lim, J. Chao, R. Rabadan, A. N. Economides, U. Basu, Noncoding RNA transcription targets AID to divergently transcribed loci in B cells. *Nature* **514**, 389–393 (2014).
50. U. Basu, F. L. Meng, C. Keim, V. Grinstein, E. Pefanis, J. Eccleston, T. Zhang, D. Myers, C. R. Wasserman, D. R. Wesemann, K. Januszyk, R. I. Gregory, H. Deng, C. D. Lima, F. W. Alt, The RNA exosome targets the AID cytidine deaminase to both strands of transcribed duplex DNA substrates. *Cell* **144**, 353–363 (2011).
51. R. Pavri, A. Gazumyan, M. Jankovic, M. Di Virgilio, I. Klein, C. Ansarah-Sobrinho, W. Resch, A. Yamane, B. R. San-Martin, V. Barreto, T. J. Nieland, D. E. Root, R. Casellas, M. C. Nussenzweig, Activation-induced cytidine deaminase targets DNA at sites of RNA polymerase II stalling by interaction with Spt5. *Cell* **143**, 122–133 (2010).
52. S. P. Methot, L. C. Litzler, P. G. Subramani, A. K. Eranki, H. Fifield, A.-M. Patenaude, J. C. Gilmore, G. E. Santiago, H. Bagci, J.-F. Côté, M. Larijani, R. E. Verdun, J. M. Di Noia, A licensing



step links AID to transcription elongation for mutagenesis in B cells. *Nat. Commun.* **9**, 1248 (2018).

53. K. L. Willmann, S. Milosevic, S. Pauklin, K. M. Schmitz, G. Rangam, M. T. Simon, S. Maslen, M. Skehel, I. Robert, V. Heyer, E. Schiavo, B. Reina-San-Martin, S. K. Petersen-Mahrt, A role for the RNA pol II-associated PAF complex in AID-induced immune diversification. *J. Exp. Med.* **209**, 2099–2111 (2012).
54. A.-S. Thomas-Claudepierre, E. Schiavo, V. Heyer, M. Fournier, A. Page, I. Robert, B. Reina-San-Martin, The cohesin complex regulates immunoglobulin class switch recombination. *J. Exp. Med.* **210**, 2495–2502 (2013).
55. M. Melko, D. Douguet, M. Bensaid, S. Zongaro, C. Verheggen, J. Gecz, B. Bardoni, Functional characterization of the AFF (AF4/FMR2) family of RNA binding proteins: Insights into the molecular pathology of FRAAXE intellectual disability. *Hum. Mol. Genet.* **20**, 1873–1885 (2011).
56. N. A. Begum, A. Stanlie, M. Nakata, H. Akiyama, T. Honjo, The histone chaperone Spt6 is required for activation-induced cytidine deaminase target determination through H3K4me3 regulation. *J. Biol. Chem.* **287**, 32415–32429 (2012).
57. A. Stanlie, N. A. Begum, H. Akiyama, T. Honjo, The DSIF subunits Spt4 and Spt5 have distinct roles at various phases of immunoglobulin class switch recombination. *PLoS Genet.* **8**, e1002675 (2012).
58. I. M. Okazaki, K. Okawa, M. Kobayashi, K. Yoshikawa, S. Kawamoto, H. Nagaoka, R. Shinkura, Y. Kitawaki, H. Taniguchi, T. Natsume, S. I. Iemura, T. Honjo, Histone chaperone Spt6 is required

for class switch recombination but not somatic hypermutation. *Proc. Natl. Acad. Sci. U.S.A.* **108**, 7920–7925 (2011).

59. K. Izumi, R. Nakato, Z. Zhang, A. C. Edmondson, S. Noon, M. C. Dulik, R. Rajagopalan, C. P. Venditti, K. Gripp, J. Samanich, E. H. Zackai, M. A. Deardorff, D. Clark, J. L. Allen, D. Dorsett, Z. Misulovin, M. Komata, M. Bando, M. Kaur, Y. Katou, K. Shirahige, I. D. Krantz, Germline gain-of-function mutations in *AFF4* cause a developmental syndrome functionally linking the super elongation complex and cohesin. *Nat. Genet.* **47**, 338–344 (2015).
60. A. Kim, L. Han, K. Yu, Immunoglobulin class switch recombination is initiated by rare cytosine deamination events at switch regions. *Mol. Cell. Biol.* **40**, e00125-20 (2020).
61. E. J. Wigton, Y. Mikami, R. J. McMonigle, C. A. Castellanos, A. K. Wade-Vallance, S. K. Zhou, R. Kageyama, A. Litterman, S. Roy, D. Kitamura, E. C. Dykhuizen, C. D. C. Allen, H. Hu, J. J. O’Shea, K. M. Ansel, MicroRNA-directed pathway discovery elucidates an miR-221/222–mediated regulatory circuit in class switch recombination. *J. Exp. Med.* **218**, e20201422 (2021).
62. R. Mandal, S. Becker, K. Strebhardt, Targeting CDK9 for anti-cancer therapeutics. *Cancers* **13**, 2181 (2021).
63. L. N. Almeida, A. Clauder, L. Meng, M. Ehlers, S. Arce, R. A. Manz, MHC haplotype and B cell autoimmunity: Correlation with pathogenic IgG autoantibody subclasses and Fc glycosylation patterns. *Eur. J. Immunol.* **52**, 197–203 (2022).
64. C. Vandamme, T. Kinnunen, B cell helper T cells and type 1 diabetes. *Scand. J. Immunol.* **92**, e12943 (2020).

65. C. M. Dayan, R. E. J. Besser, R. A. Oram, W. Hagopian, M. Vatish, O. Bendor-Samuel, M. D. Snape, J. A. Todd, Preventing type 1 diabetes in childhood. *Science* **373**, 506–510 (2021).
66. J. A. Bluestone, J. H. Buckner, K. C. Herold, Immunotherapy: Building a bridge to a cure for type 1 diabetes. *Science* **373**, 510–516 (2021).
67. K. Liang, E. R. Smith, Y. Aoi, K. L. Stoltz, H. Katagi, A. R. Woodfin, E. J. Rendleman, S. A. Marshall, D. C. Murray, L. Wang, P. A. Ozark, R. K. Mishra, R. Hashizume, G. E. Schiltz, A. Shilatifard, Targeting processive transcription elongation via SEC disruption for MYC-induced cancer therapy. *Cell* **175**, 766–779.e17 (2018).
68. C. A. Schneider, W. S. Rasband, K. W. Eliceiri, NIH Image to ImageJ: 25 years of image analysis. *Nat. Methods* **9**, 671–675 (2012).
69. S. Morita, T. Kojima, T. Kitamura, Plat-E: An efficient and stable system for transient packaging of retroviruses. *Gene Ther.* **7**, 1063–1066 (2000).
70. J. Xu, A. Husain, W. Hu, T. Honjo, M. Kobayashi, Ape1 is dispensable for S-region cleavage but required for its repair in class switch recombination. *Proc. Natl. Acad. Sci. U.S.A.* **111**, 17242–17247 (2014).
71. L. Lin, A. J. Gerth, S. L. Peng, CpG DNA redirects class-switching towards “Th1-like” Ig isotype production via TLR9 and MyD88. *Eur. J. Immunol.* **34**, 1483–1487 (2004).
72. N. S. Wang, L. J. McHeyzer-Williams, S. L. Okitsu, T. P. Burris, S. L. Reiner, M. G. McHeyzer-Williams, Divergent transcriptional programming of class-specific B cell memory by T-bet and ROR $\alpha$ . *Nat. Immunol.* **13**, 604–611 (2012).

73. B. Reina-San-Martin, S. Difilippantonio, L. Hanitsch, R. F. Masilamani, A. Nussenzweig, M. C. Nussenzweig, H2AX is required for recombination between immunoglobulin switch regions but not for intra-switch region recombination or somatic hypermutation. *J. Exp. Med.* **197**, 1767–1778 (2003).
74. M. Dinkelman, E. Spehalski, T. Stoneham, J. Buis, Y. Wu, J. M. Sekiguchi, D. O. Ferguson, Multiple functions of MRN in end-joining pathways during isotype class switching. *Nat. Struct. Mol. Biol.* **16**, 808–813 (2009).
75. R. C. Rickert, J. Roes, K. Rajewsky, B lymphocyte-specific, Cre-mediated mutagenesis in mice. *Nucleic Acids Res.* **25**, 1317–1318 (1997).
76. E. M. Cortizas, A. Zahn, M. E. Hajjar, A.-M. Patenaude, J. M. Di Noia, R. E. Verdun, Alternative end-joining and classical nonhomologous end-joining pathways repair different types of double-strand breaks during class-switch recombination. *J. Immunol.* **191**, 5751–5763 (2013).
